# Supplementary material for: Ne-22 Ion-Beam Radiation Damage to DNA: From Initial Free Radical Formation to Resulting DNA-Base Damage
Source: PubMed Central journal article supplement — ACS Omega. 2021 Jun 14;6(25):16600–11. doi: 10.1021/acsomega.1c01954 (PMC8246699; doi:10.1021/acsomega.1c01954), 2021-06-14
Supplement: ao1c01954_si_001.pdf [file ao1c01954_si_001.pdf]

## Supporting Information

# Ne-22 Ion-Beam Radiation Damage to DNA: From Initial Free Radical Formation to Resulting DNA-Base Damage

Melis Kant,<sup>a</sup> Pawel Jaruga,<sup>a</sup> Erdem Coskun,<sup>b,§</sup> Samuel Ward,<sup>c</sup> Alexander D. Stark,<sup>c</sup> Thomas Baumann,<sup>d</sup> David Becker<sup>c,\*</sup>, Amitava Adhikary<sup>c,\*</sup>, Michael D. Sevilla<sup>c,\*</sup> and Miral Dizdaroglu<sup>a,\*</sup>

<sup>a</sup> National Institute of Standards and Technology, Biomolecular Measurement Division, 100 Bureau Drive, Gaithersburg, MD 20899, USA. <sup>b</sup> University of Maryland, Institute for Bioscience & Biotechnology Research, 9600 Gudelsky Way, Rockville, MD 20850, USA. <sup>c</sup> Oakland University, Department of Chemistry, 146 Library Drive, Rochester, MI 48309, USA. <sup>d</sup> Michigan State University, National Superconducting Cyclotron Laboratory, 640 South Shaw Lane, East Lansing, MI 48824, USA.

§ Current address: National Institute of Standards and Technology, Biomolecular Measurement Division, 100 Bureau Drive, Gaithersburg, MD 20899, USA.



selection of the degraded primary beam. After passing through a 75  $\mu\text{m}$  zirconium window, 433 mm of air and 28 mm of Styrofoam, the nominal energy of the beam at the front of and before it enters a sample packet was calculated by LISE++<sup>22</sup> to be 1.363 GeV. However, the depth of formation of color centers in the plexiglass sample packet holders and the measured yields of products in the sample packets themselves both indicate that the actual energy at the sample packet entrance is ca.  $1.14 \pm 0.05$  GeV. An example of the plexiglass color center is shown in Figure S1. The average depth that the Ne-22 beam penetrates into the plexiglass is determined to be 4.94 mm. Using TRIM and this penetration depth, the energy of the beam at the front of the sample holder is found to be 1.18 GeV. Infiltration of liquid nitrogen in front of the sample packets, and, perhaps, between individual samples within the packet, likely accounts for the additional energy loss from 1.363 GeV and 1.18 GeV to the final value (1.14 GeV) cited above. At the energy of the beam, 1.1 mm of liquid nitrogen causes an energy loss of ca. 0.10 GeV. The blue arrows in Figure S2 specify the darkest region of color in the color center development and is indicative of the Bragg peak. A faint halo of color formation is visible beyond the Bragg peak. This is likely due to beam fragmentation. Beam range straggling may also account for some variation in depth.

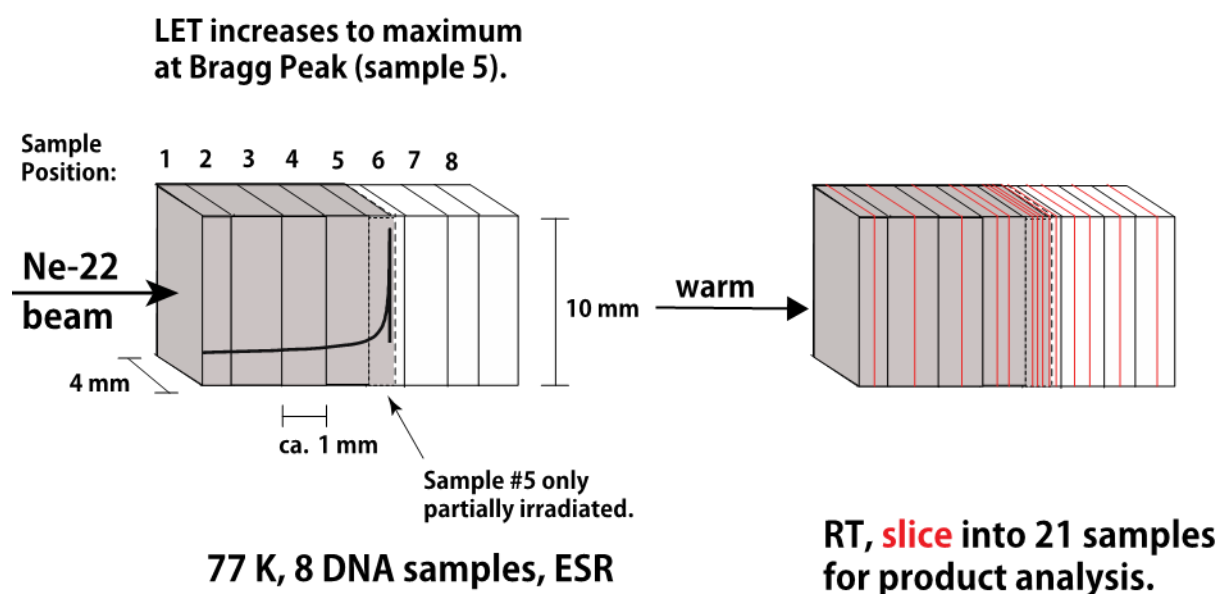

**Figure S1.** Depiction of sample packet containing eight DNA samples. Each sample has dimensions of ca. 4 mm x 10 mm x 1 mm. The Ne-22 beam is shown as stopping in the fifth sample in this packet, leaving sample #5 partially irradiated and three samples unirradiated. After warming to room temperature (RT), all of the samples are sliced into thinner slices to get better than 1 mm resolution for product













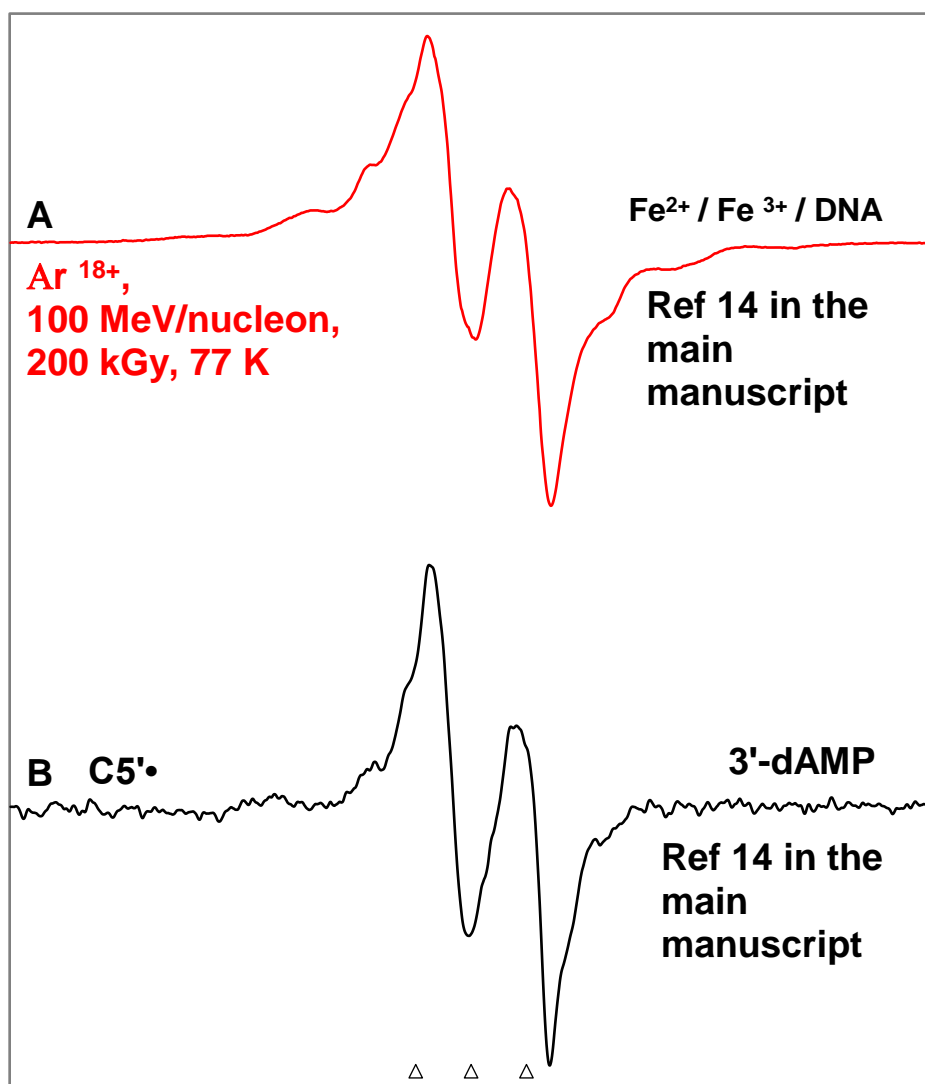

**Figure S3. Benchmark Spectrum used in ESR spectra deconvolution.** (A) Benchmark ESR spectrum resulting from the four neutral sugar radicals,  $\Sigma dR\bullet = \Sigma(C1'\bullet + C2'\bullet + C3'\bullet + C3'_{\text{dephos}}\bullet)$ . (B) Benchmark spectrum resulting from  $C5'\bullet$ . In ion beam irradiated samples, the  $C5'\bullet$  benchmark in (B) accounts for ca. 25 % of the spectrum in (A). The two spectral intensities have been adjusted so that the peak-to-peak heights are the same. (Reprinted (Adapted or Reprinted in part) with permission from A. Adhikary, D. Becker, B.J. Palmer, A.N. Heizer and M. D. Sevilla, Direct Formation of the  $C5'$ -Radical in the Sugar–Phosphate Backbone of DNA by High-Energy Radiation. *J. Phys. Chem. B*, **2012**, 116, 5900–5906) Copyright [2012], American Chemical Society), see Ref. 14 in the main manuscript.

**Table S1. Yields of 8,5'-cyclopurine-2'-deoxynucleosides in Ne-22 irradiated DNA.<sup>a</sup>**

| Dose <sup>b</sup><br>(kGy) | LET <sup>b</sup><br>(keV/μm) | R-cdA <sup>c</sup> | S-cdA <sup>c</sup> | R-cdG <sup>c</sup> | S-cdG <sup>c</sup> | R/S<br>(cdA) | R/S<br>(cdG) |
|----------------------------|------------------------------|--------------------|--------------------|--------------------|--------------------|--------------|--------------|
| 62.8                       | 107                          | 0.91±0.19          | 0.534±0.034        | 1.96±0.44          | 0.93±0.04          | 1.70         | 2.12         |
| 66.0                       | 109                          | 1.15±0.10          | 0.592±0.028        | 2.28±0.06          | 0.82±0.15          | 1.94         | 2.77         |
| 69.5                       | 163                          | 2.29±0.33          | 1.49±0.04          | 4.19±0.59          | 2.23±0.24          | 1.54         | 1.88         |
| 77.5                       | 182                          | 2.53±0.31          | 1.28± 0.10         | 4.63±0.35          | 2.22±0.22          | 1.98         | 2.08         |
| 81.7                       | 151                          | 1.76±0.18          | 1.09± 0.07         | 3.40±0.39          | 1.60±0.09          | 1.62         | 2.13         |
| 93.0                       | 171                          | 2.37±0.19          | 1.18±(0.11)        | 3.79±0.41          | 1.53±0.29          | 2.01         | 2.48         |
| 102                        | 221                          | 1.95±0.35          | 1.00±(0.19)        | 3.29±0.08          | 1.44±0.09          | 1.95         | 2.29         |
| 120                        | 261                          | 2.57±0.27          | 1.34± 0.09         | 4.60±0.39          | 1.74±0.19          | 1.92         | 2.64         |
| 151                        | 327                          | 2.26±0.10          | 1.16±0.14          | 3.68±0.36          | 1.71±0.27          | 1.95         | 2.15         |
| 226                        | 472                          | 1.03±0.32          | 0.60±0.01          | 2.76±0.25          | 0.89±0.01          | 1.71         | 3.11         |
| 362 <sup>d</sup>           | 764 <sup>d</sup>             | 1.31±0.22          | 0.65±0.032         | 2.64±0.14          | 1.23±0.07          | 2.01         | 2.15         |
| Average =                  |                              |                    |                    |                    |                    | 1.85±0.17    | 2.35±0.37    |

<sup>a</sup>Yields are shown only for those samples which are believed to have been within the beam range and were therefore irradiated and are listed in order by position in the sample packet. Please consult Figures S1 and S2 for yields of post Bragg peak samples.

<sup>b</sup>Absolute error in dose and LET for most samples is estimated to be ±15 %. All doses were calculated for this packet with the assumptions that the ion range was 5.20 mm, with beam energy 1.14 GeV. The ion range cannot be precisely measured in this experiment.

<sup>c</sup>All yields are expressed as lesions/10<sup>6</sup> DNA bases. Uncertainties are standard deviations.

<sup>d</sup>Dose and LET in the last sample irradiated are poorly characterized and subject to very large uncertainties, since they both depend on the location of the Bragg peak in the sample, i.e., the range of the ion, and this can be only approximately determined in this experiment.

**Table S2. Yields of 8,5'-cyclopurine-2'-deoxynucleosides in DNA γ-irradiated at room temperature in aqueous solution or in hydrated solid state.**

| Dose   | State    | R-cdA <sup>a</sup> | S-cdA <sup>a</sup> | R-cdG <sup>a</sup> | S-cdG <sup>a</sup> | R/S (cdA) | R/S (cdG) |
|--------|----------|--------------------|--------------------|--------------------|--------------------|-----------|-----------|
| 10 Gy  | Aqueous  | 3.54±0.04          | 3.96±0.26          | 2.77±0.03          | 3.82±0.12          | 0.90      | 0.73      |
| 20 kGy | Hydrated | 0.138±0.006        | 0.066±0.004        | 0.157±0.010        | 0.030±0.002        | 2.10      | 5.30      |

<sup>a</sup>All yields are expressed as lesions/10<sup>6</sup> bases. Uncertainties are standard deviations.
